# Supplementary material
Source: HighWire-hosted journal article supplement (http://qualitysafety.bmj.com/highwire/filestream/160037/field_highwire_adjunct_files/2/bmjqs-2020-012370supp003_data_supplement.pdf)
Supplement: bmjqs-2020-012370supp003_data_supplement.pdf [file bmjqs-2020-012370supp003_data_supplement.pdf]

Supplementary Appendix III: **“Handoff improvement and adverse events-reduction program implementation in paediatric intensive care units in Argentina: a stepped-wedge trial”**

**Adverse events**

*Severity Ratings*

GAPPS rates the severity of adverse events according to a modified version of the National Coordinating Council for Medication Error Reporting and Prevention (NCC MERP) Index for Categorizing Errors. Although the index was initially developed to rank the severity of medication errors, it is often used for broader categories of adverse events, not just those events that occur due to medication errors. The NCC MERP harm categories E through I are the standard for severity categorization in the IHI GTT as well as other published trigger tools (Loren, 2016).

|             |                                                                                 |
|-------------|---------------------------------------------------------------------------------|
| Category E: | Temporary harm to the patient and required intervention                         |
| Category F: | Temporary harm to the patient and required initial or prolonged hospitalization |
| Category G: | Permanent patient harm                                                          |
| Category H: | Intervention required to sustain life                                           |
| Category I: | Patient death                                                                   |

(Landrigan *et al.*, 2010)

*Preventability*

GAPPS seeks to identify all adverse events, regardless of whether an event is preventable, and requires reviewers to assess the preventability of adverse events. GAPPS includes assessments of preventability to facilitate the identification of clinical areas with potential for immediate improvement. Preventability is defined in GAPPS as follows:

| Category                   | Description                                                                                                                                     | Specific Case Example                                                                                                                                                                                                                                                                                                                                                                                                                                             |
|----------------------------|-------------------------------------------------------------------------------------------------------------------------------------------------|-------------------------------------------------------------------------------------------------------------------------------------------------------------------------------------------------------------------------------------------------------------------------------------------------------------------------------------------------------------------------------------------------------------------------------------------------------------------|
| Definitely not preventable | Events in which no obvious error occurred; necessary precautions were taken; no alteration in method or care exists to prevent the event.       | <i>Drug-associated rash (no prior exposure or history):</i> A 9-year-old male with no known allergies presented to the emergency department for a sore throat, cough, and fever. When the patient was given ibuprofen for his fever, he developed hives and itching. The patient was then given diphenhydramine and responded well to the drug with no respiratory distress. Ibuprofen was discontinued and listed as an allergy on the patient's medical record. |
| Probably not preventable   | Events that do not appear preventable but would require further investigation to assess certainty.                                              | <i>Procedural complications (with skilled proceduralist and no errors):</i> Despite nursing standards being followed, a 7-year-old female developed an IV infiltrate.                                                                                                                                                                                                                                                                                             |
| Probably preventable       | Events that appear preventable but would require further investigation to assess certainty.                                                     | <i>Hospital-acquired infections:</i> A male infant born at 35 weeks estimated gestation age had an umbilical catheter placed. An inflamed wound developed at the catheter site, and he was started on antibiotics. An abscess formed at the site over the next few days, so the wound was drained, and cultures were obtained that were positive for MRSA and Enterobacter spp.                                                                                   |
| Definitely preventable     | Events where error was identified; necessary precautions were not taken; event was preventable by modification of behavior, technique, or care. | <i>Medication overdose:</i> A 13-year-old female was given an overdose of insulin during treatment for diabetic ketoacidosis. Her blood glucose dropped precipitously, and she required a D50 bolus.                                                                                                                                                                                                                                                              |

(Landrigan *et al.*, 2010)

### Assessment of written and oral handoffs

Key elements evaluated for handoffs included an illness-severity assessment (unstable, watcher, stable), patient summary (defined as an oral handoff of at least three of the following: summary statement, events leading up to admission, hospital course, ongoing assessment, and active plans), action list (defined as a clearly articulated list of "to-do" items or a statement of "nothing to do"), situations & contingency plans (defined as an indication of what to do if adverse contingencies occur, or an explicit indication that no adverse contingencies were anticipated), and synthesis by the receiver (defined as readback mostly performed with small correction required or readback fully performed without need for correction), complete patient data (defined as three identification including name), transfer of erroneous information (defined as information not belong to the patient or old fashioned), omission of information (defined as omission of more than one principal diagnoses or treatment), unrelated information (defined as information not related to the patient

being handoff), accuracy of illness severity (defined as illness-severity assessment of the handoff giver and the one registered in the patient medical record), correct handoff rhythm (defined as normal rhythm of spoken voice without long interruptions), patient summary quality (as compared to the patient medical record), active listening (evaluates the receiver's attention), non-relevant information (delivered by the receiver in the synthesis), adequate synthesis length (defined as no longer than 1 minute), adequate of the receiver's questions (defined as questions related to patient state as compared to medical record).

### **Handoff observer forms**

## I-PASS Hoja de evaluación del traspaso: Escrito

Institución: \_\_\_\_\_ Fecha: \_\_\_/\_\_\_/\_\_\_ (dd/mm/aa)

Especialidad (marcar): Pediatría / Medicina / Cirugía / Otras: \_\_\_\_\_ Nombre de la Unidad: \_\_\_\_\_

Tipo de servicio: UTI / guardia general / sala de clínica / otra (especificar): \_\_\_\_\_

Información del Observador: Médico de planta/ Médico de guardia/Jefe de residentes/ Becario o Residente superior/ otro: \_\_\_\_\_

Número de individuos observados en el traspaso: \_\_\_\_\_

Frecuencia de los elementos del Mnemotecnia I-PASS (Items 1-5): Indique la frecuencia con la que está presente cada elemento del mnemónico

|   | Mnemotecnia I-PASS                          | Descripción                                                                                                      | Nunca | Raras veces | A veces | Usualmente | Siempre |
|---|---------------------------------------------|------------------------------------------------------------------------------------------------------------------|-------|-------------|---------|------------|---------|
| 1 | Importancia de la enfermedad                | Identificación de estable, "de cuidado", inestable; tiene que estar presente al inicio de la presentación        |       |             |         |            |         |
| 2 | Paciente (Resumen)                          | Podría incluir un resumen, eventos previos a la admisión, curso en el hospital, una evaluación continua, un plan |       |             |         |            |         |
| 3 | Acciones (lista)                            | Lista de tareas (debe estar separado del resumen del paciente)                                                   |       |             |         |            |         |
| 4 | Situación (alerta) / Planes de Contingencia | Sepa lo que está pasando; plan para lo que podría suceder                                                        |       |             |         |            |         |
| 5 | Síntesis por el Receptor                    | Recordatorio por escrito para avisar al receptor que resuma lo que se escuchó durante el traspaso verbal         |       |             |         |            |         |

¿Conoce a los pacientes cuyo traspaso está evaluando?

Si No

Calidad de la información transferida (Items 6-10): Solo complete si tiene suficiente conocimiento clínico de los pacientes

|   |                                                                                                                                                    | No evaluable | Nunca | Raras veces | A veces | Usualmente | Siempre |
|---|----------------------------------------------------------------------------------------------------------------------------------------------------|--------------|-------|-------------|---------|------------|---------|
| 6 | ¿Los siguientes elementos fueron completados en el documento?<br>Nombre Edad Medicación<br>HC# Servicio Fecha de admisión<br>Habitación # Alergias |              |       |             |         |            |         |
| 7 | Omisión de información relevante                                                                                                                   |              |       |             |         |            |         |
| 8 | Información no relacionada                                                                                                                         |              |       |             |         |            |         |

Califique lo siguiente:

|    |                                              | No evaluable | Malo | Pobre | Bueno | Muy bueno | Excelente |
|----|----------------------------------------------|--------------|------|-------|-------|-----------|-----------|
| 9  | Exactitud de la importancia de la enfermedad |              |      |       |       |           |           |
| 10 | Calidad del resumen de los pacientes         |              |      |       |       |           |           |

11. Qué término describe MEJOR su impresión de la duración del documento de traspaso escrito (marque uno):

Muy abreviado Abreviado Largo apropiado Largo excesivo Largo muy excesivo

|                                                      |                                                      |                              |
|------------------------------------------------------|------------------------------------------------------|------------------------------|
| 12. ¿Qué fue especialmente efectivo con el traspaso? | 13. ¿Qué aspecto (s) del traspaso podrían mejorarse? | 14. Comentarios adicionales: |
|                                                      |                                                      |                              |

## I-PASS Hoja de evaluación del traspaso: Presentador

Institución: \_\_\_\_\_ Fecha: \_\_\_/\_\_\_/\_\_\_ (dd/mm/aa)

Inicio Observación: hh:mm \_\_\_:\_\_\_ AM/PM Finalización de la Observación: hh:mm \_\_\_:\_\_\_ AM/PM

Especialidad (marcar): Pediatría / Medicina / Cirugía / Otras: \_\_\_\_\_ Nombre de la Unidad: \_\_\_\_\_

Tipo de servicio: UTI / guardia general / sala de clínica / otra (especificar): \_\_\_\_\_

Información del presentador: Médico de planta/ Médico de guardia/Jefe de residentes/ Becario o Residente superior/ otro: \_\_\_\_\_

Información del Observador: Médico de planta/ Médico de guardia/Jefe de residentes/ Becario o Residente superior/ otro: \_\_\_\_\_

Número de individuos observados en el traspaso: \_\_\_\_\_

Frecuencia de los elementos del Mnemotecnía I-PASS (Items 2-6): Indique la frecuencia con la que está presente cada elemento del mnemónico

|   | Mnemotecnía I-PASS                          | Descripción                                                                                                         | Nunca | Raras veces | A veces | Usualmente | Siempre |
|---|---------------------------------------------|---------------------------------------------------------------------------------------------------------------------|-------|-------------|---------|------------|---------|
| 2 | Importancia de la enfermedad                | Identificación de estable, "de cuidado", inestable; tiene que estar presente al inicio de la presentación           |       |             |         |            |         |
| 3 | Paciente (Resumen)                          | Podría incluir un resumen, eventos previos a la admisión, un curso en el hospital, una evaluación continua, un plan |       |             |         |            |         |
| 4 | Acciones (lista)                            | Lista de tareas (debe estar separado del resumen del paciente)                                                      |       |             |         |            |         |
| 5 | Situación (alerta) / Planes de Contingencia | Sepa lo que está pasando; plan para lo que podría suceder                                                           |       |             |         |            |         |
| 6 | Síntesis por el Receptor                    | Asegura que el receptor resume verbalmente lo que escuchó                                                           |       |             |         |            |         |

¿Conoce a los pacientes cuyo traspaso está evaluando?

Sí No

Calidad de la información transferida (Items 7-12): Solo complete si tiene suficiente conocimiento clínico de los pacientes

|    | Califique la frecuencia con la que el proveedor que hizo el traspaso incluyó lo siguiente:                                                         | No evaluable | Nunca | Raras veces | A veces | Usualmente | Siempre |
|----|----------------------------------------------------------------------------------------------------------------------------------------------------|--------------|-------|-------------|---------|------------|---------|
| 7  | ¿Los siguientes elementos fueron completados en el documento?<br>Nombre Edad Medicación<br>HC# Servicio Fecha de admisión<br>Habitación # Alergias |              |       |             |         |            |         |
| 8  | Transferencia de información errónea                                                                                                               |              |       |             |         |            |         |
| 9  | Omisión de información importante                                                                                                                  |              |       |             |         |            |         |
| 10 | Información no relacionada                                                                                                                         |              |       |             |         |            |         |

Califique lo siguiente:

|    |                                              | No evaluable | Malo | Pobre | Bueno | Muy bueno | Excelente |
|----|----------------------------------------------|--------------|------|-------|-------|-----------|-----------|
| 11 | Exactitud de la importancia de la enfermedad |              |      |       |       |           |           |
| 12 | Calidad del resumen de los pacientes         |              |      |       |       |           |           |

13. Haz un círculo alrededor de la frase que MEJOR describe el ritmo de la transferencia:

Ritmo muy lento /  
Muy ineficiente

Ritmo lento /  
Ineficiente

Ritmo óptimo /  
Eficiente

Rápido / Ritmo  
apresurado

Muy Rápido / Ritmo  
muy apresurado

|                                                      |                                                      |                              |
|------------------------------------------------------|------------------------------------------------------|------------------------------|
| 14. ¿Qué fue especialmente efectivo con el traspaso? | 15. ¿Qué aspecto (s) del traspaso podrían mejorarse? | 16. Comentarios adicionales: |
|                                                      |                                                      |                              |

## I-PASS Hoja de evaluación del traspaso: Receptor

Institución: \_\_\_\_\_ Fecha: \_\_\_/\_\_\_/\_\_\_ (dd/mm/aa)  
 Inicio Observación: hh:mm \_\_\_:\_\_\_ AM/PM Finalización de la Observación: hh:mm \_\_\_:\_\_\_ AM/PM  
 Especialidad (marcar): Pediatría / Medicina / Cirugía / Otras: \_\_\_\_\_ Nombre de la Unidad: \_\_\_\_\_  
 Tipo de servicio: UTI / guardia general / sala de clínica / otra (especificar): \_\_\_\_\_  
 Información del Receptor: Médico de planta/ Médico de guardia/Jefe de residentes/Becario o Residente superior/ otro: \_\_\_\_\_  
 Información del Observador: Médico de planta/Médico de guardia Jefe de residentes/ Becario o Residente superior/ otro: \_\_\_\_\_  
 Número de individuos observados en el traspaso: \_\_\_\_\_

.0

| ¿Con qué frecuencia el proveedor que recibió la transferencia hizo lo siguiente? |                                                                                           | Nunca | Raras veces | A veces | Usualmente | Siempre |
|----------------------------------------------------------------------------------|-------------------------------------------------------------------------------------------|-------|-------------|---------|------------|---------|
| 1                                                                                | Verbaliza una síntesis de cada paciente (es decir, revisa o lee el traspaso del paciente) |       |             |         |            |         |
| 2                                                                                | Parece enfocado, comprometido y demuestra habilidades de escucha activa                   |       |             |         |            |         |

¿Conoce a los pacientes cuyo traspaso está evaluando? (Observador)

Si  No 

| Califique la frecuencia con la cual el proveedor que recibió el traspaso incluyó lo siguiente: |                          | Nunca | Raras veces | A veces | Usualmente | Siempre |
|------------------------------------------------------------------------------------------------|--------------------------|-------|-------------|---------|------------|---------|
| 3                                                                                              | Información no relevante |       |             |         |            |         |

Califique lo siguiente:

|   |                                     | No evaluable | Malo | Pobre | Bueno | Muy bueno | Excelente |
|---|-------------------------------------|--------------|------|-------|-------|-----------|-----------|
| 4 | Calidad de la Síntesis del Receptor |              |      |       |       |           |           |

5. ¿Qué frase enumerada a continuación MEJOR describe su impresión de la adecuación de la longitud y el grado de detalle de la síntesis por parte del receptor (marque uno)?

Insuficientemente extenso y detallado  Apropriadamente extenso y detallado  Excesivamente extenso y detallado 

6. ¿Qué frase enumerada a continuación describe MEJOR su impresión de la congruencia de la cantidad de preguntas pertinentes y aclaratorias formuladas por el receptor en esta transferencia (marque una)?

Insuficiente número de preguntas  Apropiado número de preguntas  Excesivo número de preguntas 

|                                                                                               |                                                                               |                             |
|-----------------------------------------------------------------------------------------------|-------------------------------------------------------------------------------|-----------------------------|
| 7. ¿Qué aspectos del papel del receptor en esta transferencia fueron especialmente efectivos? | 8. ¿Qué aspecto (s) del papel del receptor en este traspaso podría mejorarse? | 9. Comentarios adicionales: |
|                                                                                               |                                                                               |                             |
